# Supplementary figures and images for: Heterogeneity of first‐line palliative systemic treatment in synchronous metastatic esophagogastric cancer patients: A real‐world evidence study
Source: PubMed Central journal article supplement — Int J Cancer. 2019 Aug 24;146(7):1889–901. doi: 10.1002/ijc.32580 (PMC7027521; doi:10.1002/ijc.32580), 2019-08-24

**Supplementary Figure 2. Subdivision of systemic therapy regimens**

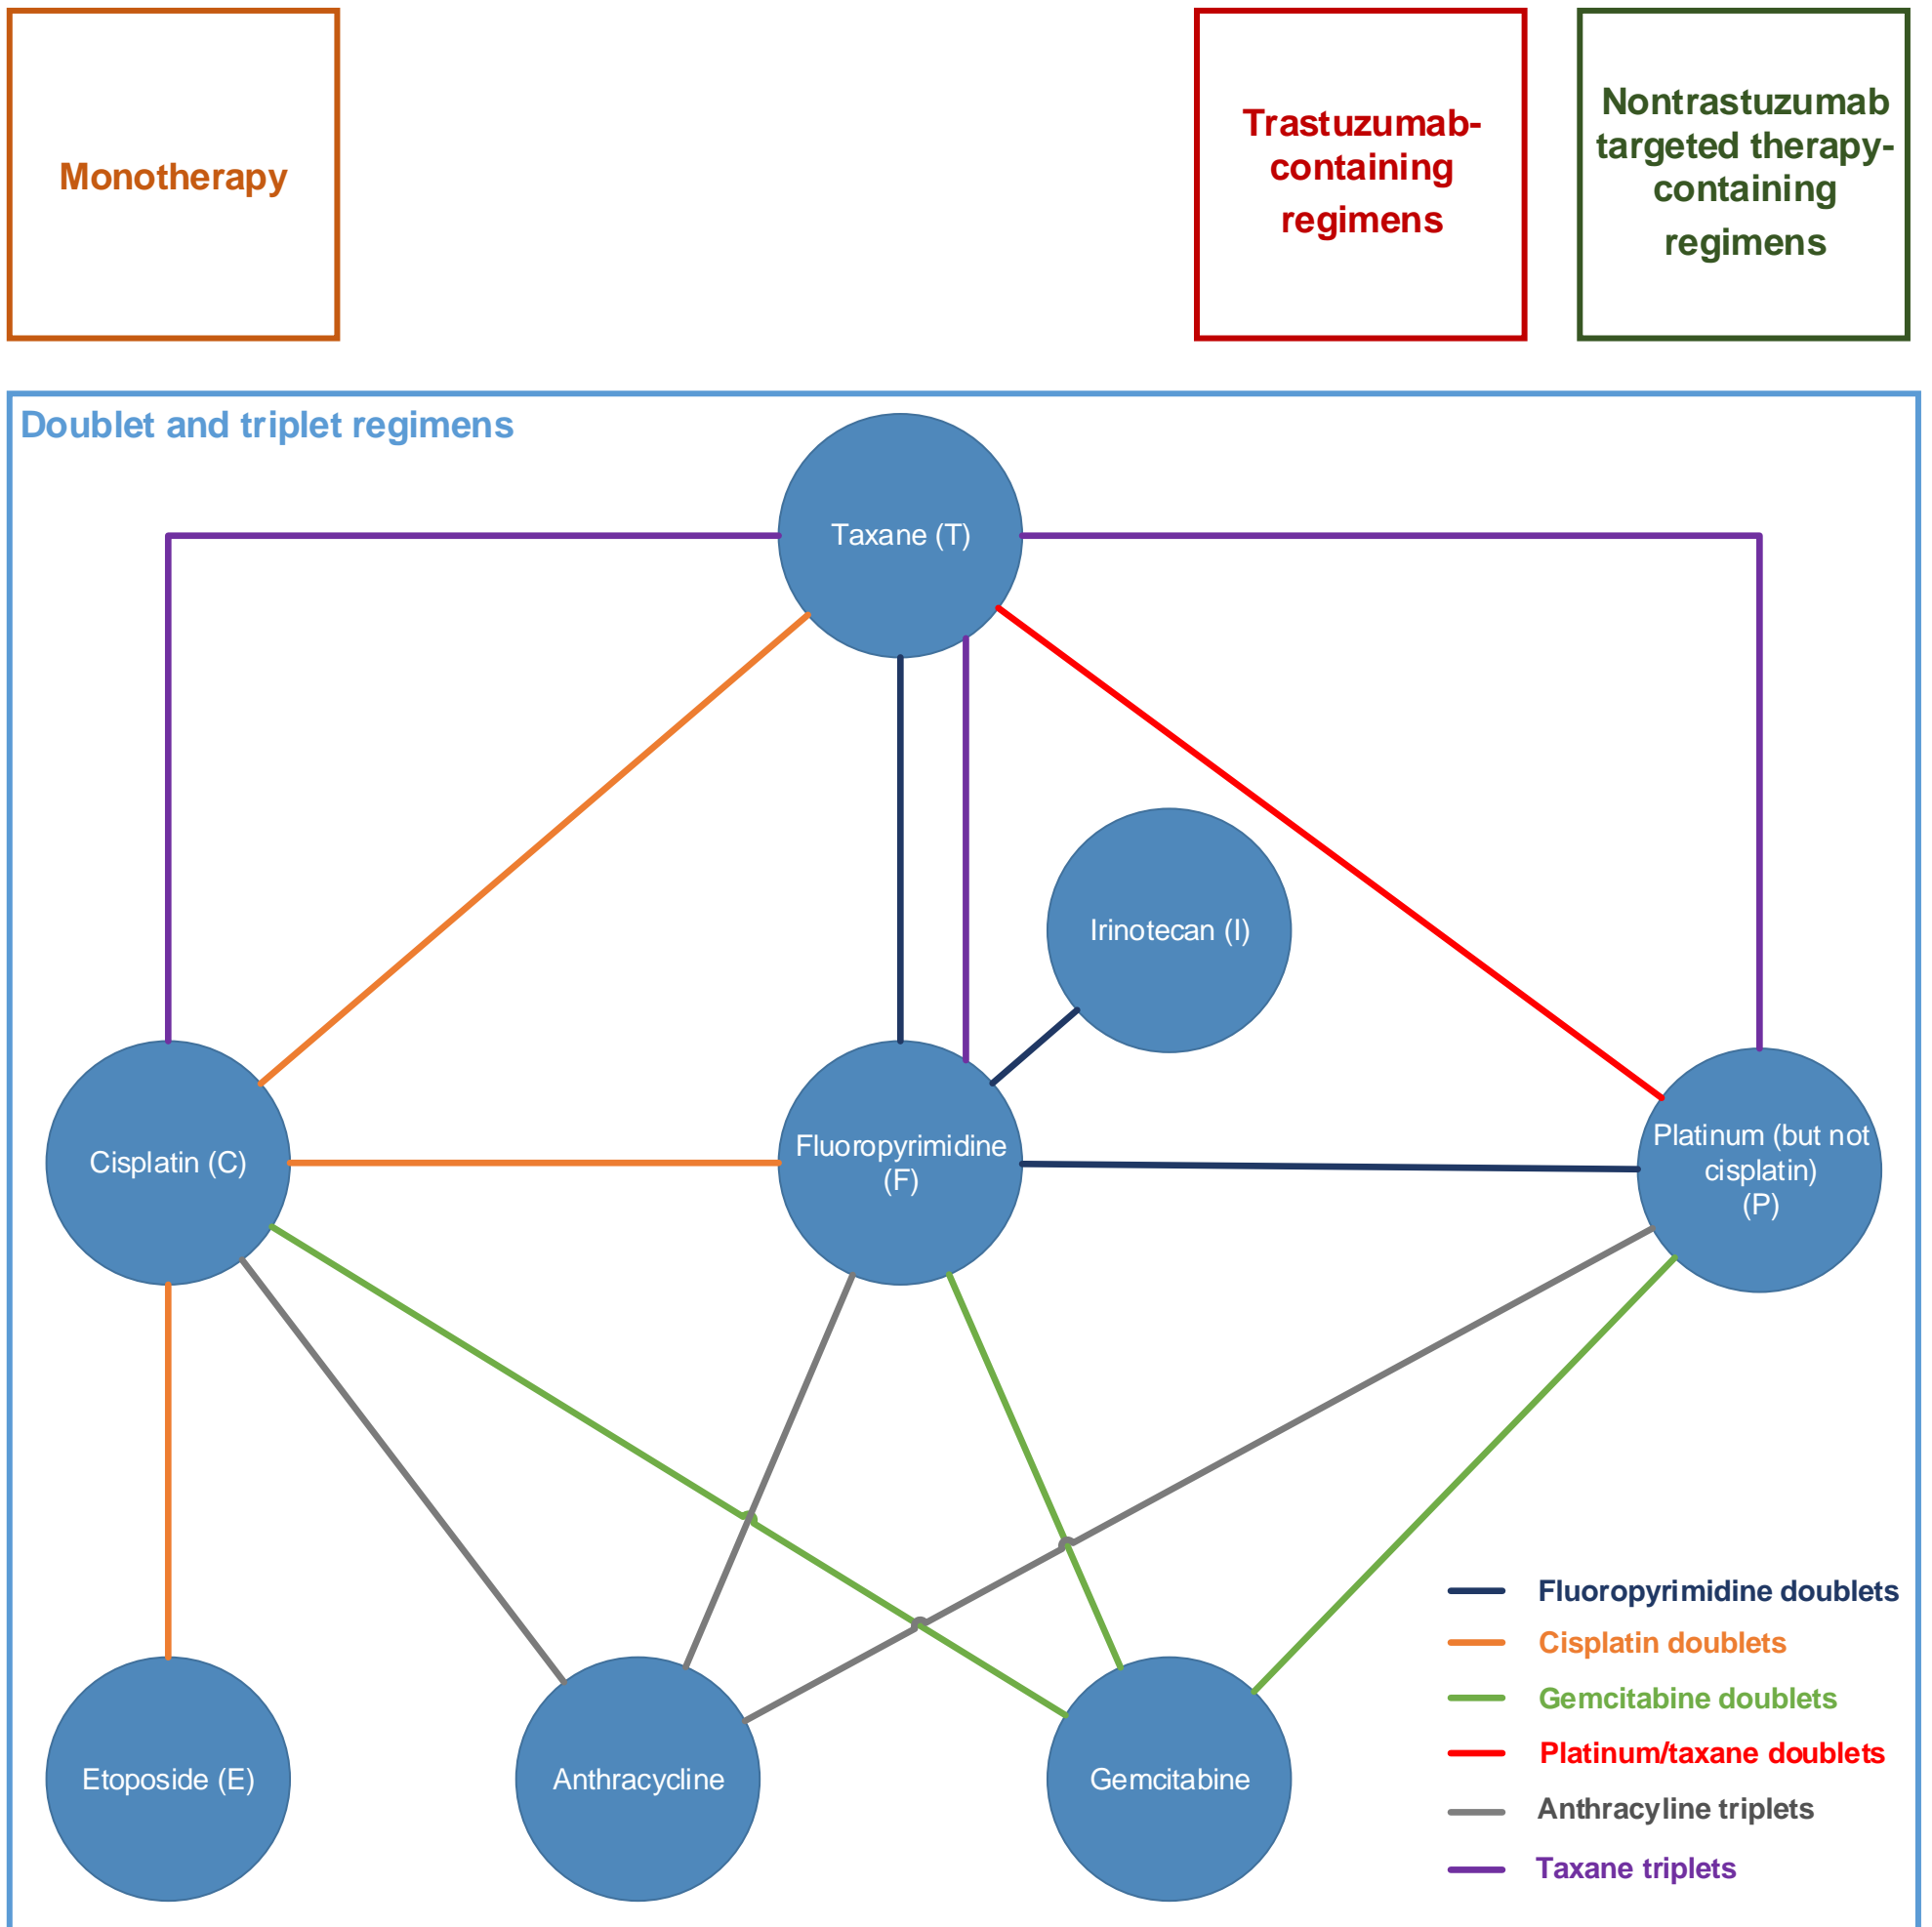

Supplement: IJC-146-1889-s003.pdf [file IJC-146-1889-s003.pdf]
